# Supplementary material for: Long-term dynamics of aberrant neuronal activity in awake Alzheimer’s disease transgenic mice
Source: PubMed Central journal article supplement (PMC8651654; doi:10.1038/s42003-021-02884-7), 2021-12-07
Supplement: 42003_2021_2884_MOESM2_ESM.pdf [file 42003_2021_2884_MOESM2_ESM.pdf]

## Description of Additional Supplementary Files

**File name:** Supplementary Data 1

**Description:** Average neuronal activity over time.

**File name:** Supplementary Data 2

**Description:** Soluble and insoluble amyloid beta concentrations.

**File name:** Supplementary Data 3

**Description:** Activity change of individual neurons over time.

**File name:** Supplementary Data 4

**Description:** Similarity index of activity levels.

**File name:** Supplementary Data 5

**Description:** Activity category of individual neurons in WT mice.

**File name:** Supplementary Data 6

**Description:** Activity category of individual neurons in APPPS1 mice.

**File name:** Supplementary Data 7

**Description:** Activity change highly active neurons.

**File name:** Supplementary Data 8

**Description:** Activity change intermediately active neurons.

**File name:** Supplementary Data 9

**Description:** Activity change rarely active neurons.

**File name:** Supplementary Data 10

**Description:** Reoccurrence rate of activity levels.

**File name:** Supplementary Data 11

**Description:** Fraction of stable activity category for neurons close and distant to amyloid plaques.

**File name:** Supplementary Data 12

**Description:** Activity change as function of plaque distance.

**File name:** Supplementary Data 13

**Description:** Pairwise activity correlations.

**File name:** Supplementary Data 14

**Description:** Pairwise activity correlations during stationary and whisking epochs.
